# Supplementary material for: Western corn rootworm (Diabrotica virgifera virgifera) transcriptome assembly and genomic analysis of population structure
Source: PubMed Central journal article supplement (PMC4004143; doi:10.1186/1471-2164-15-195), 2014-03-14

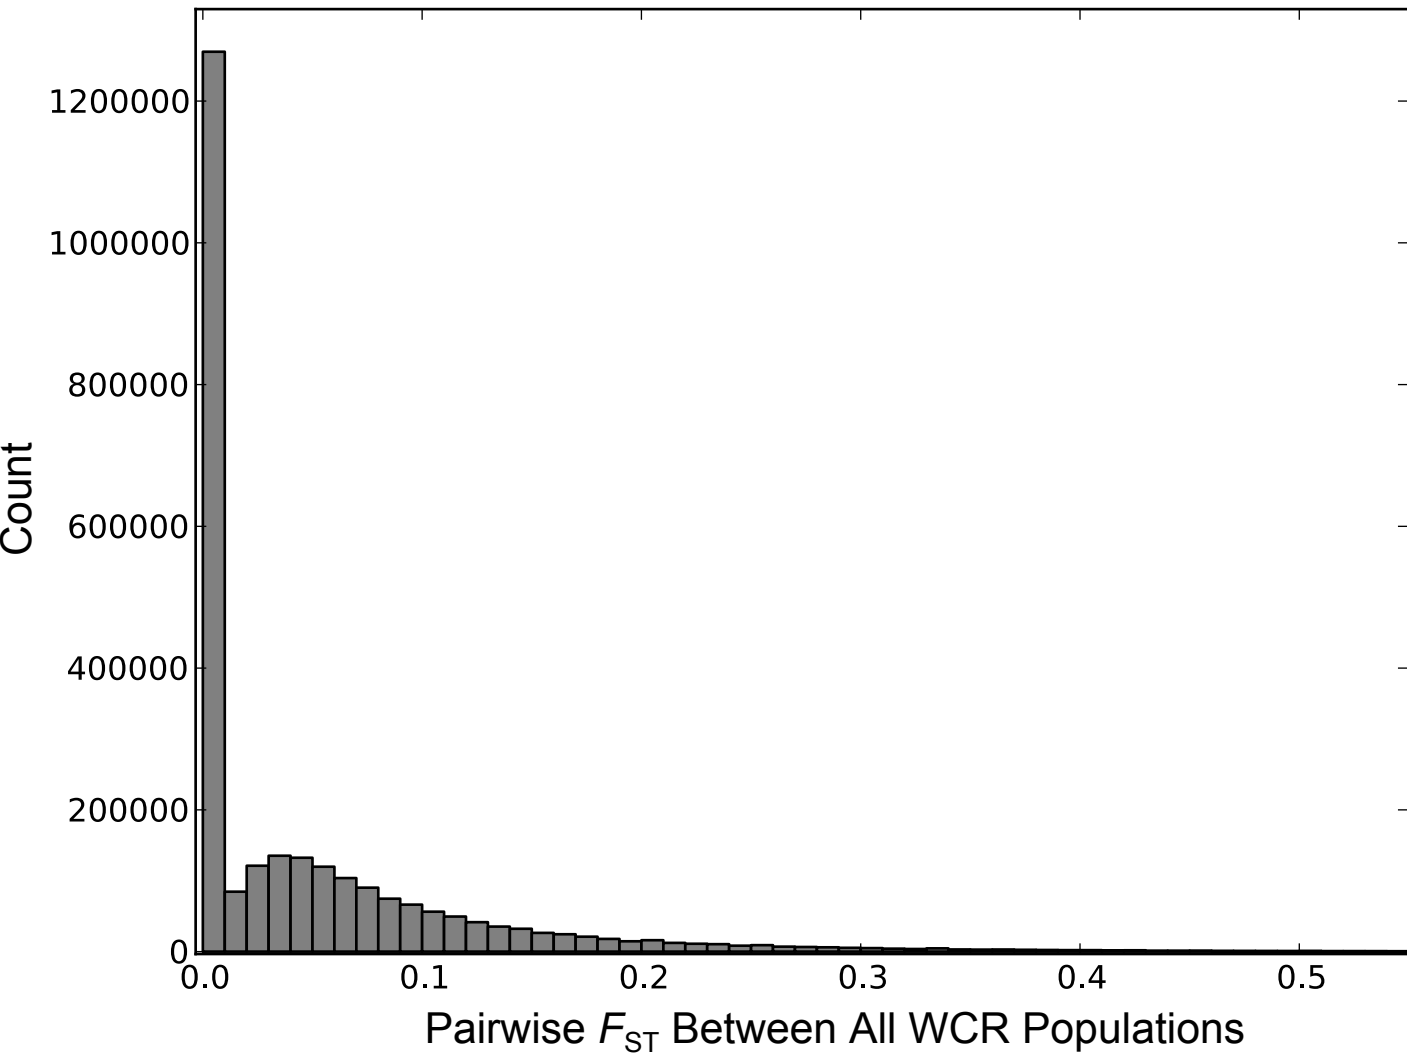

Supplement: 12864_2013_7033_MOESM13_ESM.pdf [file 12864_2013_7033_MOESM13_ESM.pdf]
